# Supplementary material for: Weaning of maintenance immunosuppressive therapy in lupus nephritis (WIN-Lupus): results of a multicentre randomised controlled trial
Source: PubMed Central journal article supplement — Ann Rheum Dis. 2022 Jun 20;81(10):1420–7. doi: 10.1136/annrheumdis-2022-222435 (PMC9484365; doi:10.1136/annrheumdis-2022-222435), 2022-06-20
Supplement: annrheumdis-2022-222435supp001.pdf [file annrheumdis-2022-222435supp001.pdf]

## Supplementary Figure 1. WIN-Lupus: study objectives and design

To test whether maintenance immunosuppressive therapy (IST) discontinuation after 2–3 years is non-inferior to IST continuation for two more years.

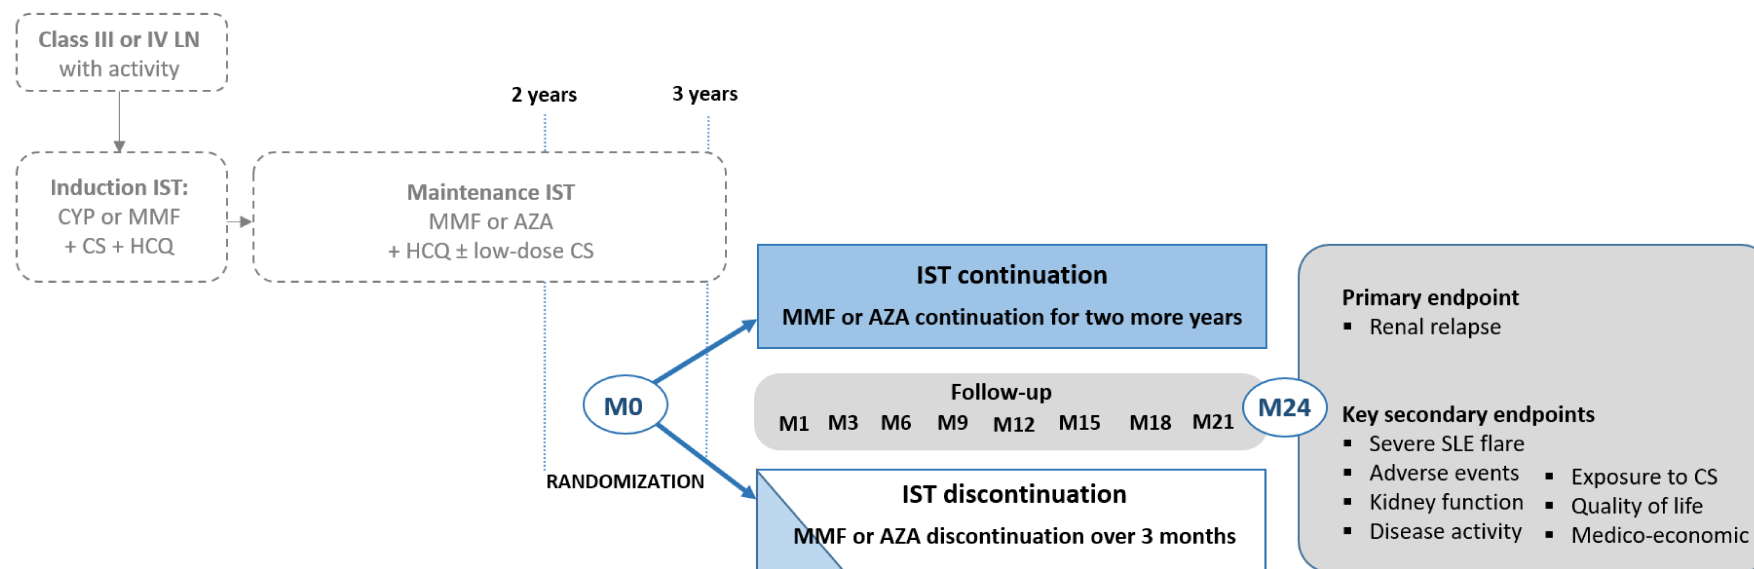

### Key eligibility criteria:

- ≥ 18-years-old
- On maintenance IST for 2–3 years
- On HCQ
- Stable in remission

■ Maintenance IST with MMF or AZA after randomisation

CS: corticosteroids; CYP: cyclophosphamide; IST: immunosuppressive therapy; LN: lupus nephritis; MMF: mycophenolate mofetil; AZA azathioprine; SLE: systemic lupus erythematosus; HCQ: hydroxychloroquine

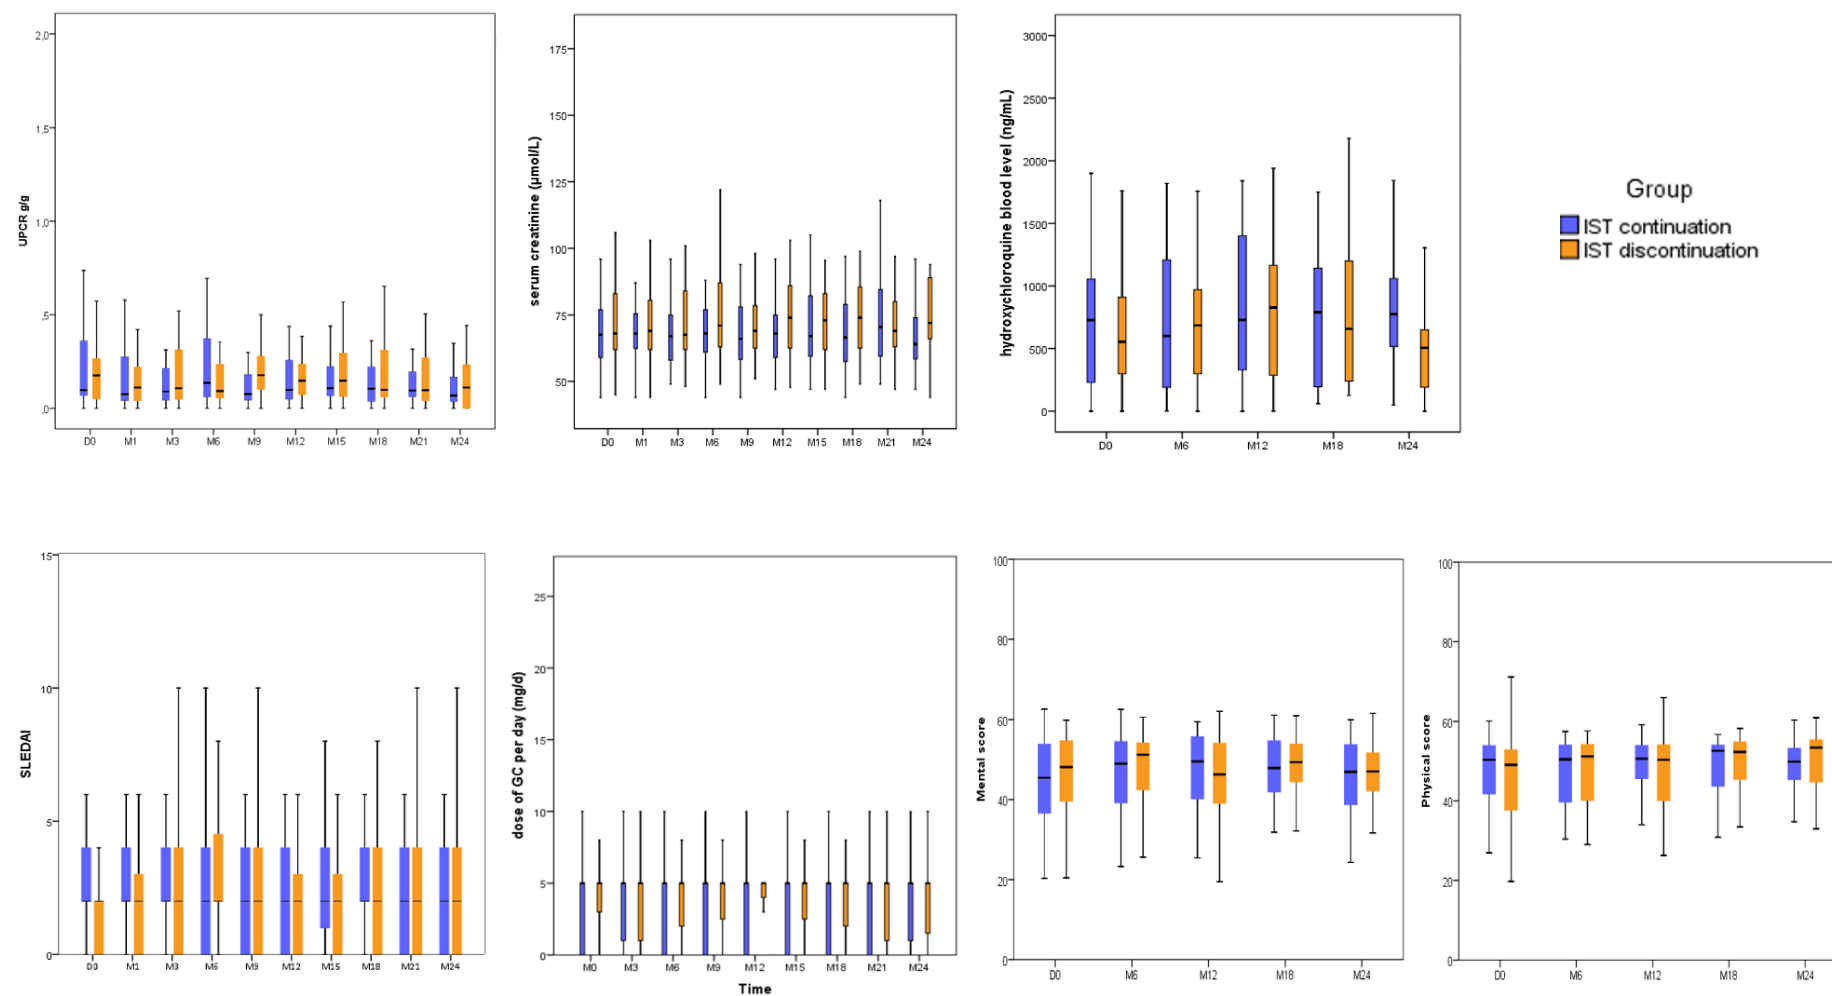

**Supplementary Figure 2. Evolution of key secondary criteria in patients with IST continuation (blue) and in patients with IST discontinuation (orange).**

UPCR: urinary protein to creatinine ratio; SLEDAI: systemic lupus erythematosus disease activity index; CS: corticosteroids; SF-36: short-form 36 health survey.

**Supplementary Table 1. Baseline characteristics of the patients at randomization (intent to treat population)**

| Characteristics                           | IST continuation | IST discontinuation |
|-------------------------------------------|------------------|---------------------|
|                                           | (N=48)           | (N=48)              |
|                                           | Mean (SD)        | Mean (SD)           |
|                                           | N (%)            | N (%)               |
| Age, years                                | 37.9 ± 14.4      | 36.2 ± (12.9)       |
| Sex, female                               | 38 (79.2%)       | 41 (85.4%)          |
| Ethnicity                                 |                  |                     |
| Caucasian                                 | 34 (70.8%)       | 29 (60.4%)          |
| Black                                     | 10 (20.8%)       | 15 (31.3%)          |
| Asian                                     | 4 (8.3%)         | 4 (8.3%)            |
| SLE disease duration, years               | 9.4 ± 10         | 7.3 ± 6             |
| Antiphospholipid syndrome                 | 7 (14.6%)        | 7 (14.6%)           |
| Menopause                                 | 8/36 (22.2%)     | 10/42 (23.8%)       |
| Obesity (body mass index ≥30)             | 5 (10.4%)        | 6 (12.5%)           |
| Systolic blood pressure, mmHg             | 122 (13)         | 117 (14)            |
| Diastolic blood pressure, mmHg            | 74 (11)          | 73 (10)             |
| First flare of proliferative LN           | 37 (77.1%)       | 36 (75.0%)          |
| Induction therapy                         |                  |                     |
| Low-dose IV cyclophosphamide              | 31 (64.6%)       | 28 (58.3%)          |
| Mycophenolate mofetil                     | 17 (35.4%)       | 20 (41.7%)          |
| Maintenance IST                           |                  |                     |
| Duration, years                           | 2.8 (0.86)       | 2.8 (0.66)          |
| Mycophenolate mofetil                     | 38 (79.2%)       | 40 (83.3%)          |
| Azathioprine                              | 10 (20.8%)       | 8 (16.7%)           |
| Doses prescribed, mg/day                  |                  |                     |
| Mycophenolate mofetil                     | 1581 (664)       | 1340 (748)          |
| Azathioprine                              | 82.5 (29)        | 81.2 (39)           |
| Corticosteroids                           | 4.1 (2.8)        | 4.3 (2.8)           |
| Hydroxychloroquine                        | 354 (111)        | 335 (140)           |
| Hydroxychloroquine serum level, ng/L      | 791 (688)        | 641 (427)           |
| Serum creatinine, μmol/L                  | 68.8 (14.8)      | 72.9 (16.7)         |
| Estimated GFR, mL/min/1.73 m <sup>2</sup> | 99.9 (26.8)      | 94.7 (25.5)         |
| Chronic kidney disease stage              |                  |                     |
| Stage 1                                   | 31 (64.6%)       | 28 (58.3%)          |
| Stage 2                                   | 16 (33.3%)       | 15 (31.3%)          |
| Stage 3                                   | 1 (2.1%)         | 5 (10.4%)           |
| Urinary protein/creatinine ratio, g/g     | 0.288 (0.399)    | 0.208 (0.269)       |
| Urinary protein/creatinine ratio ≤0.2 g/g | 32 (66.7%)       | 32 (66.7%)          |
| Urinary protein/creatinine ratio ≤0.5 g/g | 40 (83.3%)       | 46 (95.8%)          |
| Urinary protein/creatinine ratio ≤0.7 g/g | 41 (85.4%)       | 47 (97.9%)          |
| Serum albumin, g/dL                       | 4.1 (0.5)        | 4.2 (0.4)           |
| Hemoglobin, g/dL                          | 13.1 (1.7)       | 12.9 (1.3)          |
| Leukocytes, G/L                           | 5.89 (2.04)      | 5.61 (2.32)         |
| Lymphocytes, G/L                          | 1.48 (0.63)      | 1.36 (0.57)         |
| Platelets, G/L                            | 257 (87)         | 240 (77)            |
| Low C3                                    | 7/46 (15.2%)     | 6/46 (13.0%)        |
| Low C4                                    | 7/46 (15.2%)     | 5/46 (10.9%)        |
| Positive anti-dsDNA                       | 31/46 (67.4%)    | 25/48 (52.1%)       |
| SLEDAI score                              | 2.4 (1.8)        | 1.5 (1.7)           |

Data are expressed as Mean (SD), number (%), or number/number available (%).

IST: immunosuppressive therapy; SLE: systemic lupus erythematosus; LN: lupus nephritis; GFR: glomerular filtration rate; SLEDAI: SLE disease activity index.

**Supplementary Table 2: Baseline individual characteristics of the 17 patients who presented a renal relapse, and renal presentation and pathology at the time of LN relapse.**

| IST Group       | Sex    | Age | Ethnicity | 1st flare of LN | Initial LN ISN/RSP             | M0 Low C3 | M0 SLEDAI | M0 eGFR | M0 UPCR | Timing of LN relapse | LN Relapse eGFR | LN Relapse UPCR | LN Relapse ISN/RSP             |
|-----------------|--------|-----|-----------|-----------------|--------------------------------|-----------|-----------|---------|---------|----------------------|-----------------|-----------------|--------------------------------|
| Continuation    | Female | 26  | Caucasian | No              | IV-S-A/C<br>(A 90%, C 5%)      | No        | 2         | 124     | 0.47    | M12                  | 103             | 1.44            | IV-G-A/C<br>(A 78%, C 33%)     |
| Continuation    | Female | 33  | Asian     | Yes             | IV-S-A/C + V<br>(A 90%, C 10%) | Yes       | 8*        | 98      | 1.04    | M5                   | 95              | 1.72            | III-A/C + V<br>(A 30%, C 30%)  |
| Continuation    | Female | 22  | Caucasian | Yes             | III-A<br>(A 45%)               | Yes       | 6**       | 111     | 1.13    | M9                   | 74              | 4.95            | IV-G-A/C<br>(A 60%, C 15%)     |
| Continuation    | Female | 20  | Caucasian | Yes             | IV-G-A<br>(A 100%)             | No        | 2         | 137     | 0.74    | M21                  | 107             | 2.21            | III-A/C + V<br>(A 15%, C 30%)  |
| Continuation    | Female | 46  | Caucasian | Yes             | III-A/C<br>(A 7%, C 20%)       | NA        | 2         | 104     | 1.72    | M6                   | 80              | 2.89            | IV-S-A/C<br>(A 55%, C 20%)     |
| Discontinuation | Female | 22  | Caucasian | Yes             | IV-G-A<br>(A 100%)             | Yes       | 4         | 108     | 0.05    | M9                   | 116             | 0.83            | III-S-A/C<br>(A 25% C 25%)     |
| Discontinuation | Female | 41  | Asian     | No              | III-A/C<br>(A 44%, C 37%)      | No        | 8         | 92      | 0.2     | M5                   | 68              | 3.71            | IV-G-A/C<br>(A 73%, C 33%)     |
| Discontinuation | Female | 30  | Asian     | Yes             | IV-G-A<br>(A 100%)             | Yes       | 4         | 118     | 0.15    | M21                  | 112             | 0.48            | IV-S-A/C<br>(A 63%, C 11%)     |
| Discontinuation | Female | 41  | Caucasian | No              | IV-G-A<br>(A 100%)             | No        | 0         | 60      | 0.44    | M3                   | 43              | 6.88            | IV-G-A/C<br>(A 77%, C 27%)     |
| Discontinuation | Female | 18  | Black     | Yes             | III-A<br>(A 35%)               | Yes       | 4         | 142     | 0.08    | M15                  | 156             | 0.80            | III-A<br>(A 37%)               |
| Discontinuation | Female | 31  | Caucasian | Yes             | IV-S-A/C<br>A 100%, C 3%       | No        | 0         | 95      | 0.26    | M8                   | 48              | 6.6             | #                              |
| Discontinuation | Female | 48  | Black     | No              | IV-G-A/C<br>(A 100%, C 8%)     | No        | 0         | 89      | 0.41    | M6                   | 130             | 0.54            | III-A/C<br>(A 25%, C 16%)      |
| Discontinuation | Female | 24  | Black     | Yes             | IV-G-A/C<br>(A 95%, C 15%)     | No        | 2         | 124     | 0.27    | M9                   | 82              | 0.96            | IV-G-A/C<br>(A 91%, C 21%)     |
| Discontinuation | Female | 32  | Caucasian | Yes             | IV-G-A<br>(A 100%)             | No        | 4         | 93      | 0.06    | M21                  | 100             | 1.37            | III-A<br>(A 30%)               |
| Discontinuation | Female | 19  | Black     | No              | IV-S-A + V<br>(A 80%)          | No        | 0         | 146     | 1.77    | M6                   | 159             | 2.42            | IV-S-A/C + V<br>(A 10%, C 50%) |
| Discontinuation | Female | 37  | Black     | Yes             | IV-S-A/C<br>(A 87%, C 47%)     | Yes       | 4         | 116     | 0.17    | M9                   | 78              | 0.76            | IV-S-A/C + V<br>(A 5%, C 72%)  |
| Discontinuation | Female | 59  | Caucasian | Yes             | III-A/C<br>(A 20%, C 10%)      | No        | 2         | 66      | 0.35    | M6                   | 61              | 1.52            | IV-S-A/C + V<br>(A 25%, C 25%) |

\*SLEDAI of this patient at inclusion comprised low C3, positive anti-dsDNA and persistent proteinuria. \*\*SLEDAI of this patient at inclusion comprised low C3 and persistent proteinuria. # No new kidney biopsy was performed at LN relapse for this patient, who presented acute kidney injury with a nephrotic syndrome and active urinary sediment. A: activity (% of glomeruli with active lesions). C: chronicity (% of glomeruli with chronic lesions). eGFR: estimated glomerular filtration rate. ISN/RPS: International Society of Nephrology/Renal Pathology Society 2003 classification. LN: lupus nephritis. NA: not available. UPCR: urinary protein to creatinine ratio.

**Supplementary Table 3. Comparison of health-related costs per patient over the follow-up period between patients with IST continuation and patients with IST discontinuation in the total per-protocol population (N=84) and according to relapse status**

|                                      | Total per-protocol population<br>(N=84) |                              | Renal relapse<br>(N=17) |                        | No renal relapse<br>(N=67) |                        |
|--------------------------------------|-----------------------------------------|------------------------------|-------------------------|------------------------|----------------------------|------------------------|
|                                      | Mean costs (95% CI)                     |                              | Mean costs (95% CI)     |                        | Mean costs (95% CI)        |                        |
|                                      | IST<br>continuation                     | IST<br>discontinuation       | IST<br>continuation     | IST<br>discontinuation | IST<br>continuation        | IST<br>discontinuation |
| Total cost (Euros)                   | <b>2654**</b><br>(1925–3383)            | <b>1581**</b><br>(1055–2107) | 4532<br>(0-10 554)      | 3394<br>(2235-4552)    | 2385**<br>(1832-2939)      | 929**<br>(505-1354)    |
| Maintenance IST costs <sup>a</sup>   | <b>1750**</b><br>(1300–2200)            | <b>296**</b><br>(86–507)     | 530<br>(0-1211)         | 245<br>(36-454)        | 1924**<br>(1440-2408)      | 335**<br>(31-637)      |
| Antimalarial drug costs <sup>b</sup> | 184<br>(165–203)                        | 159<br>(132–186)             | 85<br>(4-166)           | 74<br>(45-104)         | 198<br>(183-214)           | 198<br>(170-226)       |
| Corticosteroid costs <sup>c</sup>    | 42<br>(32–52)                           | 31<br>(24–38)                | 45<br>(0-103)           | 16<br>(8-24)           | 41<br>(32-51)              | 37<br>(29-46)          |
| Inpatient care costs <sup>d</sup>    | <b>678*</b><br>(23–1333)                | <b>1095*</b><br>(588–1602)   | 3873<br>(0-9263)        | 3059<br>(1928-4190)    | 222<br>(0-543)             | 359<br>(42-676)        |

95%CI: 95% confidence interval; IST: immunosuppressive therapy.

<sup>a</sup> included mycophenolate mofetil (CELLCEPT®)/mycophenolic acid (MYFORTIC®) and azathioprine (IMUREL®);

<sup>b</sup> included hydroxychloroquine (PLAQUENIL®);

<sup>c</sup> included prednisone (CORTANCYL®), prednisolone (SOLUPRED®) and methylprednisolone (SOLUMEDROL®) ;

<sup>d</sup> included hospitalizations during follow-up and relapse care (including a biopsy for confirmation and hospital length of stay according to disease severity) (only 25 patients underwent inpatient care (n=17 (38.6%) vs. 8 (20%) in the IST discontinuation and IST continuation group, respectively).

\*p<0.05, \*\*p<0.01 for the comparison between IST continuation and IST discontinuation (independent-samples, Student's t-test).

**Supplementary Table 4. Risk factors for severe flare of SLE at inclusion (per-protocol population)**

|                                                  | Severe flare<br>(N=19) | No severe flare<br>(N=65) | p            |
|--------------------------------------------------|------------------------|---------------------------|--------------|
|                                                  | Mean (SD)              | Mean (SD)                 |              |
|                                                  | N (%)                  | N (%)                     |              |
| <b>Age, years</b>                                | <b>31.7 (11.3)</b>     | <b>38.7 (13.8)</b>        | <b>0.047</b> |
| <b>Sex, female</b>                               | <b>19 (100.0%)</b>     | <b>52 (80.0%)</b>         | <b>0.034</b> |
| Ethnicity                                        |                        |                           | 0.450        |
| Caucasian                                        | 10 (52.6%)             | 43 (66.2%)                | -            |
| Black                                            | 6 (31.6%)              | 17 (26.2%)                | -            |
| Asian                                            | 3 (15.8%)              | 5 (7.7%)                  | -            |
| SLE disease duration                             | 8.1 (5.6)              | 8.7 (9.0)                 | 0.786        |
| Associated antiphospholipid syndrome             | 5 (26.3%)              | 6 (9.2%)                  | 0.114        |
| Menopause                                        | 1 (5.3%)               | 15/50 (30.0%)             | 0.052        |
| Obesity                                          | 3 (15.8%)              | 8 (12.3%)                 | 0.706        |
| First flare of proliferative LN                  | 13 (68.4%)             | 51 (78.5%)                | 0.373        |
| Induction therapy                                |                        |                           | 0.869        |
| Intravenous cyclophosphamide                     | 11 (57.9%)             | 39 (60.0%)                | -            |
| Mycophenolate mofetil                            | 8 (42.1%)              | 26 (40.0%)                | -            |
| Maintenance IST duration at M0, years            | 2.7 (1.0)              | 2.9 (0.7)                 | 0.433        |
| Maintenance IST                                  |                        |                           | 0.540        |
| Mycophenolate mofetil                            | 14 (73.7%)             | 52 (80.0%)                | -            |
| Azathioprine                                     | 5 (26.3%)              | 13 (20.0%)                | -            |
| Dose prescribed at M0, mg/day                    |                        |                           |              |
| Mycophenolate mofetil                            | 1392.9 (684.4)         | 1510.2 (639.3)            | 0.553        |
| Azathioprine                                     | 80.0 (27.4)            | 82.7 (35.9)               | 0.882        |
| Corticosteroids                                  | 4.9 (3.2)              | 4.1 (2.6)                 | 0.279        |
| Hydroxychloroquine                               | 331.6 (142.6)          | 353.8 (104.7)             | 0.455        |
| Serum hydroxychloroquine levels, ng/L            | 758 (485)              | 729 (604)                 | 0.857        |
| Serum hydroxychloroquine <200 ng/L               | 3 (17.6%)              | 11 (21.6%)                | 1.00         |
| <b>Serum creatinine, µmol/L</b>                  | <b>62.8 (10.5)</b>     | <b>72.4 (16.9)</b>        | <b>0.025</b> |
| <b>Estimated GFR, mL/min/1.73 m<sup>2</sup></b>  | <b>109.9 (25.8)</b>    | <b>94.6 (26.5)</b>        | <b>0.029</b> |
| Chronic kidney disease stage                     |                        |                           | 0.067        |
| Stage 1                                          | 16 (84.2%)             | 36 (55.4%)                | -            |
| Stage 2                                          | 2 (10.5%)              | 24 (36.9%)                | -            |
| Stage 3                                          | 1 (5.3%)               | 5 (7.7%)                  | -            |
| <b>Urinary protein/creatinine ratio, g/g</b>     | <b>0.50 (0.54)</b>     | <b>0.17 (0.19)</b>        | <b>0.017</b> |
| <b>Urinary protein/creatinine ratio ≤0.2 g/g</b> | <b>7 (36.8%)</b>       | <b>48 (73.8%)</b>         | <b>0.003</b> |
| <b>Urinary protein/creatinine ratio ≤0.5 g/g</b> | <b>14 (73.7%)</b>      | <b>62 (95.4%)</b>         | <b>0.013</b> |
| <b>Urinary protein/creatinine ratio ≤0.7 g/g</b> | <b>14 (73.7%)</b>      | <b>64 (98.5%)</b>         | <b>0.002</b> |
| <b>Serum albumin, g/dL</b>                       | <b>3.9 (0.3)</b>       | <b>4.3 (0.4)</b>          | <b>0.002</b> |
| <b>Hemoglobin level, g/dL</b>                    | <b>12.0 (1.3)</b>      | <b>13.2 (1.4)</b>         | <b>0.001</b> |
| <b>Leukocyte count, G/L</b>                      | <b>4.7 (2.4)</b>       | <b>5.9 (1.9)</b>          | <b>0.037</b> |
| <b>Lymphocyte count, G/L</b>                     | <b>1.1 (0.5)</b>       | <b>1.5 (0.6)</b>          | <b>0.012</b> |
| Basophil count, G/L                              | 0.01 (0.01)            | 0.02 (0.02)               | 0.075        |
| Eosinophil count, G/L                            | 0.04 (0.04)            | 0.11 (0.14)               | 0.069        |
| Platelet count, G/L                              | 285 (129)              | 237 (63)                  | 0.137        |
| <b>Low C3</b>                                    | <b>6/18 (33.3%)</b>    | <b>4/62 (6.5%)</b>        | <b>0.007</b> |
| Low C4                                           | 3/18 (16.7%)           | 5/62 (8.1%)               | 0.370        |
| <b>Positive anti-dsDNA</b>                       | <b>15 (78.9%)</b>      | <b>34 (52.4%)</b>         | <b>0.039</b> |
| <b>SLEDAI score</b>                              | <b>3 (2.4)</b>         | <b>1.6 (1.4)</b>          | <b>0.023</b> |

Data are expressed as % or mean (SD). In the case of missing data, the number/number available (%) is indicated.

IST: immunosuppressive therapy; SLE: systemic lupus erythematosus; LN: lupus nephritis; GFR: glomerular filtration rate; SLEDAI: SLE disease activity index.

**Supplemental Table 5. Risk factors for renal relapse after IST discontinuation (patients randomized in the IST discontinuation group, per-protocol population)**

|                                                 | <b>Relapse<br/>(N=12)</b> | <b>No relapse<br/>(N=32)</b> | <b>p</b>     |
|-------------------------------------------------|---------------------------|------------------------------|--------------|
|                                                 | Mean (SD)<br>N (%)        | Mean (SD)<br>N (%)           |              |
| Age, years                                      | 33.7 (12.4)               | 37.8 (13.6)                  | 0.368        |
| Sex, female                                     | 12 (100.0%)               | 26 (81.3%)                   | 0.167        |
| Ethnicity                                       |                           |                              | 0.302        |
| Caucasian                                       | 5 (41.7%)                 | 21 (65.6%)                   |              |
| Black                                           | 5 (41.7%)                 | 9 (28.1%)                    |              |
| Asian                                           | 2 (16.7%)                 | 2 (6.3%)                     |              |
| SLE disease duration, years                     | 6.9 (5.2)                 | 7.9 (6.6)                    | 0.638        |
| Antiphospholipid syndrome                       | 3 (25.0%)                 | 3 (9.4%)                     | 0.321        |
| Menopause                                       | 1 (8.3%)                  | 9/26 (34.6%)                 | 0.131        |
| Obesity                                         | 2 (16.7%)                 | 4 (12.5%)                    | 0.658        |
| First flare of proliferative LN                 | 8 (66.7%)                 | 24 (75.0%)                   | 0.707        |
| Induction therapy with                          |                           |                              | 0.711        |
| Intravenous cyclophosphamide                    | 6 (50.0%)                 | 18 (56.3%)                   |              |
| Mycophenolate mofetil                           | 6 (50.0%)                 | 14 (43.7%)                   |              |
| Maintenance IST duration at M0                  | 2.7 (1.1)                 | 2.9 (0.4)                    | 0.359        |
| Maintenance IST                                 |                           |                              | 0.413        |
| Mycophenolate mofetil                           | 11 (91.7%)                | 25 (78.1%)                   |              |
| Azathioprine                                    | 1 (8.3)                   | 7 (21.9%)                    |              |
| Serum [HCQ] levels, ng/L                        | 851 (435)                 | 562 (404)                    | 0.057        |
| Serum [HCQ] levels < 200 ng/L                   | 0 (0.0%)                  | 7 (25.0%)                    | 0.159        |
| Serum creatinine $\mu$ mol/L                    | 66.3 (10.6)               | 75.0 (18.6)                  | 0.151        |
| Estimated GFR mL/min/1.73 m <sup>2</sup>        | 104.2 (26.7)              | 91.4 (25.0)                  | 0.146        |
| Chronic kidney disease stage                    |                           |                              | 0.413        |
| Stage 1                                         | 9 (75.0%)                 | 17 (53.1%)                   |              |
| Stage 2                                         | 2 (16.7%)                 | 11 (34.4%)                   |              |
| Stage 3                                         | 1 (8.3%)                  | 4 (12.5%)                    |              |
| Urinary protein/creatinine ratio, g/g           | 0.35 (0.47)               | 0.16 (0.14)                  | 0.193        |
| Urinary protein/creatinine ratio $\leq$ 0.2 g/g | 5 (41.7%)                 | 24 (75.0%)                   | 0.071        |
| Urinary protein/creatinine ratio $\leq$ 0.5 g/g | 11 (91.7%)                | 31 (96.9%)                   | 0.476        |
| Urinary protein/creatinine ratio $\leq$ 0.7 g/g | 11 (91.7%)                | 32 (100.0%)                  | 0.273        |
| <b>Serum albumin, g/dL</b>                      | <b>3.9 (0.4)</b>          | <b>4.3 (0.3)</b>             | <b>0.005</b> |
| <b>Hemoglobin, g/dL</b>                         | <b>12.1 (1.4)</b>         | <b>13.1 (1.1)</b>            | <b>0.011</b> |
| Leukocytes, G/L                                 | 4.8 (2.9)                 | 5.9 (2.2)                    | 0.197        |
| <b>Lymphocytes, G/L</b>                         | <b>1.1 (0.4)</b>          | <b>1.5 (0.6)</b>             | <b>0.039</b> |
| Basophils, G/L                                  | 0.01 (0.01)               | 0.02 (0.02)                  | 0.081        |
| Eosinophils, G/L                                | 0.05 (0.04)               | 0.1 (0.1)                    | 0.116        |
| Platelets, G/L                                  | 271 (124)                 | 229 (55)                     | 0.137        |
| <b>Low C3</b>                                   | <b>4 (33.3%)</b>          | <b>1/30 (3.3%)</b>           | <b>0.018</b> |
| Low C4                                          | 2 (16.7%)                 | 2/30 (6.7%)                  | 0.565        |
| Positive anti-dsDNA                             | 8 (66.7%)                 | 16 (50.0%)                   | 0.323        |
| SLEDAI score at M0                              | 2.5 (2.4)                 | 1.25 (1.3)                   | 0.114        |

Data are expressed as number (%) or mean (SD). IST: immunosuppressive therapy; SLE: systemic lupus erythematosus; LN: lupus nephritis; GFR: glomerular filtration rate.

**Supplemental Table 6. Risk factors for severe SLE flare after IST discontinuation (patients randomized in the IST discontinuation group, per-protocol population).**

|                                                      | Relapse<br>(N=14)   | No Relapse<br>(N=30) | p            |
|------------------------------------------------------|---------------------|----------------------|--------------|
|                                                      | Mean (SD)<br>N (%)  | Mean (SD)<br>N (%)   |              |
| Age, years                                           | 32.6 (11.8)         | 38.6 (13.6)          | 0.158        |
| Sex, female                                          | 14 (100.0%)         | 24 (80.0%)           | 0.155        |
| Ethnicity                                            |                     |                      | 0.315        |
| Caucasian                                            | 6 (42.9%)           | 20 (66.7%)           |              |
| Black                                                | 6 (42.9%)           | 8 (26.7%)            |              |
| Asian                                                | 2 (14.3%)           | 2 (6.7%)             |              |
| SLE disease duration, years                          | 7.2 (4.9)           | 7.9 (6.8)            | 0.747        |
| Antiphospholipid syndrome                            | 3 (21.4%)           | 3 (10.0%)            | 0.364        |
| Menopause                                            | 1 (7.1%)            | 9/24 (37.5%)         | 0.064        |
| Obesity                                              | 3 (21.4%)           | 3 (10.0%)            | 0.364        |
| First flare of proliferative LN                      | 9 (64.3%)           | 23 (76.7%)           | 0.475        |
| Induction therapy with                               |                     |                      | 0.679        |
| Intravenous cyclophosphamide                         | 7 (50.0%)           | 17 (56.7%)           |              |
| Mycophenolate mofetil                                | 7 (50.0%)           | 13 (43.3%)           |              |
| Maintenance IST duration at M0                       | 2.8 (1.1)           | 2.8 (0.4)            | 0.804        |
| Maintenance IST                                      |                     |                      | 1.00         |
| Mycophenolate mofetil                                | 12 (85.7%)          | 24 (80.0%)           |              |
| Azathioprine                                         | 2 (14.3%)           | 6 (20.0%)            |              |
| Serum [HCQ] levels, ng/L                             | 804 (437)           | 564 (409)            | 0.100        |
| Serum [HCQ] levels < 200 ng/L                        | 1 (7.7%)            | 6 (23.1%)            | 0.388        |
| <b>Serum creatinine <math>\mu\text{mol/L}</math></b> | <b>64.5 (10.9)</b>  | <b>76.3 (18.3)</b>   | <b>0.013</b> |
| <b>Estimated GFR mL/min/1.73m<sup>2</sup></b>        | <b>108.2 (28.9)</b> | <b>88.6 (22.1)</b>   | <b>0.017</b> |
| Chronic kidney disease stage                         |                     |                      | 0.196        |
| Stage 1                                              | 11 (78.6%)          | 15 (50.0%)           |              |
| Stage 2                                              | 2 (14.3%)           | 11 (36.7%)           |              |
| Stage 3                                              | 1 (7.1%)            | 4 (13.3%)            |              |
| Urinary protein/creatinine ratio, g/g                | 0.32 (0.44)         | 0.17 (0.15)          | 0.098        |
| Urinary protein/creatinine ratio $\leq 0.2$ g/g      | 7 (50.0%)           | 22 (73.3%)           | 0.177        |
| Urinary protein/creatinine ratio $\leq 0.5$ g/g      | 13 (92.9%)          | 29 (96.7%)           | 0.540        |
| Urinary protein/creatinine ratio $\leq 0.7$ g/g      | 13 (92.9%)          | 30 (100.0%)          | 0.318        |
| <b>Serum albumin, g/dL</b>                           | <b>3.9 (0.3)</b>    | <b>4.3 (0.3)</b>     | <b>0.003</b> |
| <b>Hemoglobin, g/dL</b>                              | <b>12.1 (1.3)</b>   | <b>13.2 (1.1)</b>    | <b>0.008</b> |
| Leukocytes, G/L                                      | 4.7 (2.8)           | 6.0 (2.2)            | 0.101        |
| Lymphocytes, G/L                                     | 1.2 (0.6)           | 1.5 (0.6)            | 0.236        |
| <b>Basophils, G/L</b>                                | <b>0.01 (0.01)</b>  | <b>0.02 (0.02)</b>   | <b>0.045</b> |
| Eosinophils, G/L                                     | 0.05 (0.05)         | 0.1 (0.1)            | 0.087        |
| Platelets, G/L                                       | 268 (122)           | 228 (49)             | 0.130        |
| <b>Low C3</b>                                        | <b>4 (28.6%)</b>    | <b>1 (3.6%)</b>      | <b>0.035</b> |
| Low C4                                               | 2 (14.3%)           | 2/28 (7.1%)          | 0.59         |
| Positive anti-dsDNA                                  | 10 (71.4%)          | 14 (46.7%)           | 0.124        |
| <b>SLEDAI score at M0</b>                            | <b>2.5 (2.2)</b>    | <b>1.2 (1.3)</b>     | <b>0.018</b> |

Data are expressed as number (%) or mean (SD).

IST: immunosuppressive therapy; SLE: systemic lupus erythematosus; LN: lupus nephritis; GFR: glomerular filtration rate; SLEDAI: SLE disease activity index.
